# Supplementary material for: Interface engineering of highly stable CeO 2 /CoFe@C electrocatalysts for synergistically boosting overall alkaline water splitting performance
Source: Royal Society of Chemistry journal article supplement (doi:10.1039/d4qi02487g), 2024-11-16
Supplement: d4qi02487g1.pdf [file d4qi02487g1.pdf]

## Supporting materials

### **Interface Engineering of Highly Stable CeO<sub>2</sub>/CoFe@C Electrocatalysts for Synergistically Boosting Overall Alkaline Water Splitting Performance**

Waleed Yaseen<sup>a,1</sup>, Karim Harrath<sup>b,1</sup>, Guangya Li<sup>a</sup>, Bashir Adegbemiga Yusuf<sup>a</sup>, Suci Meng<sup>a\*</sup>, Meng Xie<sup>a</sup>, Iltaf Khan<sup>c</sup>, Jimin Xie<sup>a,d</sup>, Changkun Xia,<sup>a</sup> Yuanguo Xu<sup>a\*</sup>

<sup>a</sup>School of Materials Science & Engineering, School of Chemistry and Chemical Engineering, School of Pharmacy, Jiangsu University, Zhenjiang 212013, China

<sup>b</sup>Fundamental Science Center of Rare Earths, Ganjiang Innovation Academy, Chinese Academy of Sciences, Ganzhou 341000, China

<sup>c</sup>School of Environmental & Chemical Engineering Jiangsu University of Science and Technology Zhenjiang 212003, PR China

<sup>d</sup>Jiangsu Jiangke Graphene Research Institute Co., LTD, Jiangsu Jiangke Composite Material Co., LTD

\*Corresponding authors: Suci Meng ([mengsc@ujs.edu.cn](mailto:mengsc@ujs.edu.cn)), Yuanguo Xu ([xuyg@ujs.edu.cn](mailto:xuyg@ujs.edu.cn))

<sup>1</sup>These authors contributed equally to this work

## 1.1 Calibration of Hg/HgO reference electrodes to RHE potential

The reference electrodes were calibrated within a conventional three-electrode cell system, wherein the flame-annealed Pt foil served as both the working and counter electrode, and Mercury/mercury oxide (Hg/HgO) functioned as the reference electrode in 1.0 M KOH at 25 °C. Before the electrode calibration, high-purity H<sub>2</sub> gas was purged into the electrolyte solution for 25 minutes to eliminate impurities. The linear sweep voltammetry (LSV) curve was generated with a scan rate of 5 mV s<sup>-1</sup>, and the zero current was established as the thermodynamic potential for the Hydrogen Evolution Reaction (HER). The findings revealed that at zero current, the potential intersecting at that point was considered the thermodynamic potential for HER at a specific pH. Consequently, all recorded potentials were normalized using the formula  $E_{(RHE)} = E_{Hg/HgO} + 0.921$  (1.0 M KOH, pH=14), as illustrated in Fig S1(a-b).

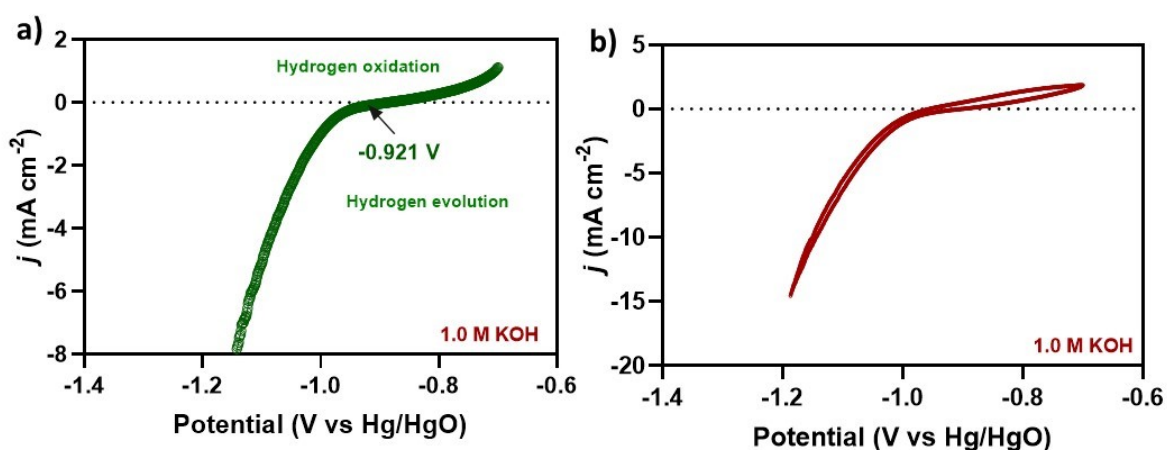

**Fig. S1.** (a) LSV polarization calibration curves of Hg/HgO reference electrode in 1.0 M KOH; and (b) Corresponding CV curves in 1.0 M KOH.

## 1.2 Faradaic Efficiency and H<sub>2</sub>/O<sub>2</sub> volume calculations

The Faradaic efficiency was determined by analyzing the overall quantity of generated H<sub>2</sub> and O<sub>2</sub> alongside the total charge (Q) transmitted through the electrolytic cell. The water drainage method measured the total volume of H<sub>2</sub>/O<sub>2</sub> produced. Afterwards, a constant current density of 100 mAcm<sup>-2</sup> was applied for a certain period. Assuming the production of one O<sub>2</sub> and H<sub>2</sub> molecule requires four electrons and two electrons, respectively [1,2].

**Step 1:** Calculate the charge

$$Q = I * t$$

Q is the charge in coulombs (C), I is the current in amperes (A), and t is the time in seconds (s)

**Step 2:** Calculate the moles of hydrogen and oxygen

$$n = Q / (2 * F) \text{ for H}_2$$

$$n = Q / (4 * F) \text{ for O}_2$$

F is the Faraday constant in coulombs per mole (96485 C/mol)

**Step 3:** Calculate the volume of hydrogen and oxygen gas

$$V_{\text{H}_2} = n (\text{H}_2) * V_m$$

$$V_{\text{O}_2} = n (\text{O}_2) * V_m$$

The molar volume (V<sub>m</sub>) is the volume occupied by one mole of gas at standard temperature and pressure (STP). STP is 0°C (273.15 K) and 1 atmosphere (101,325 Pa). The molar volume of a gas at STP is approximately 22.4 L/mol.

**Step 4: Faradaic efficiency calculation**

Faradaic efficiency of water splitting catalyzed by Ce<sub>20</sub>CoFe@C/750 was calculated by dividing the amount of the experimentally produced gas by the theoretical amount of gas, which is calculated by the charge passed through the electrode:

$$FE (\text{H}_2, \%) = \frac{V_{\text{experiment}}}{V_{\text{theoretical}}} \times 100\% = \frac{V_{\text{experiment}}}{[(2/4) * (Q/F) * V_m]} \times 100\% \quad \text{for HER}$$

$$FE (\text{H}_2, \%) = \frac{V_{\text{experiment}}}{V_{\text{theoretical}}} \times 100\% = \frac{V_{\text{experiment}}}{[(1/4) * (Q/F) * V_m]} \times 100\% \quad \text{for OER}$$



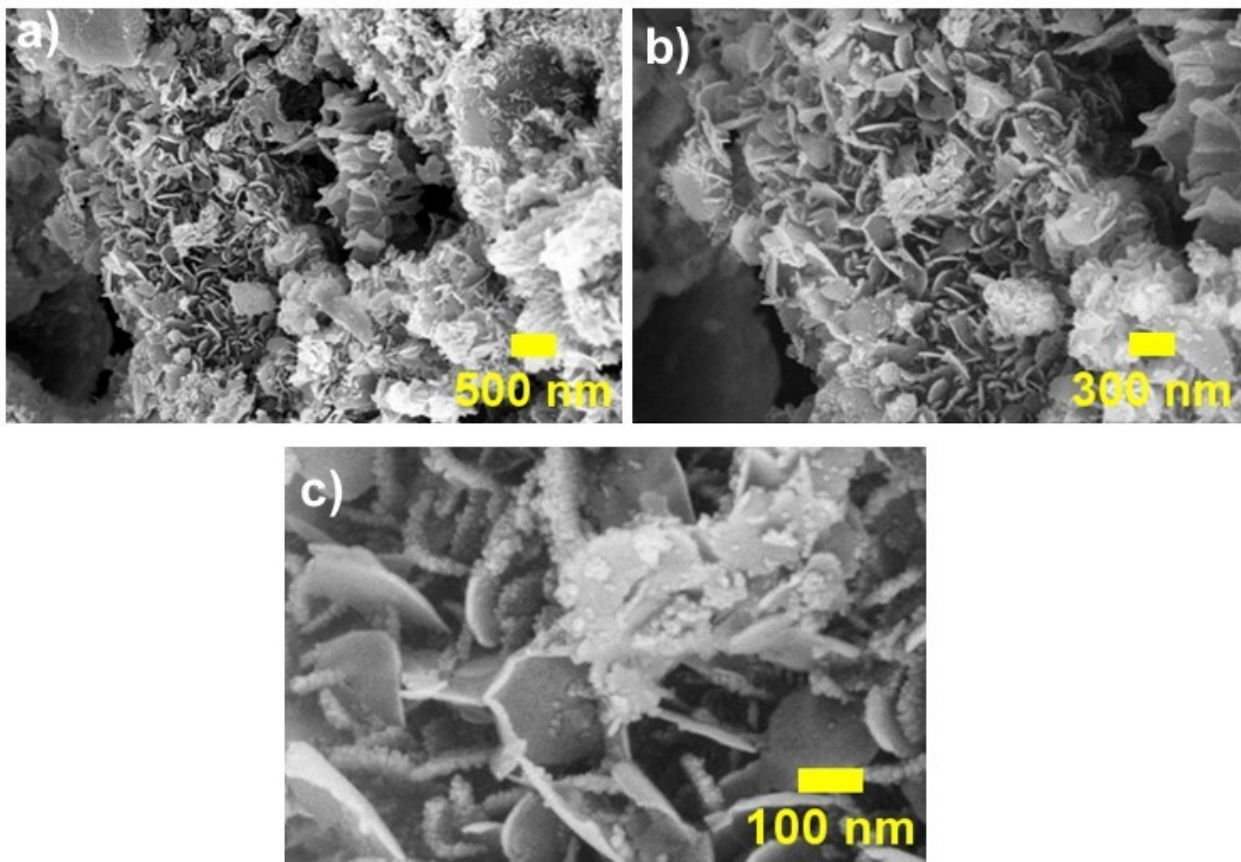

**Fig. S2.** (a-c) SEM images of CoFe@C/750 sample.

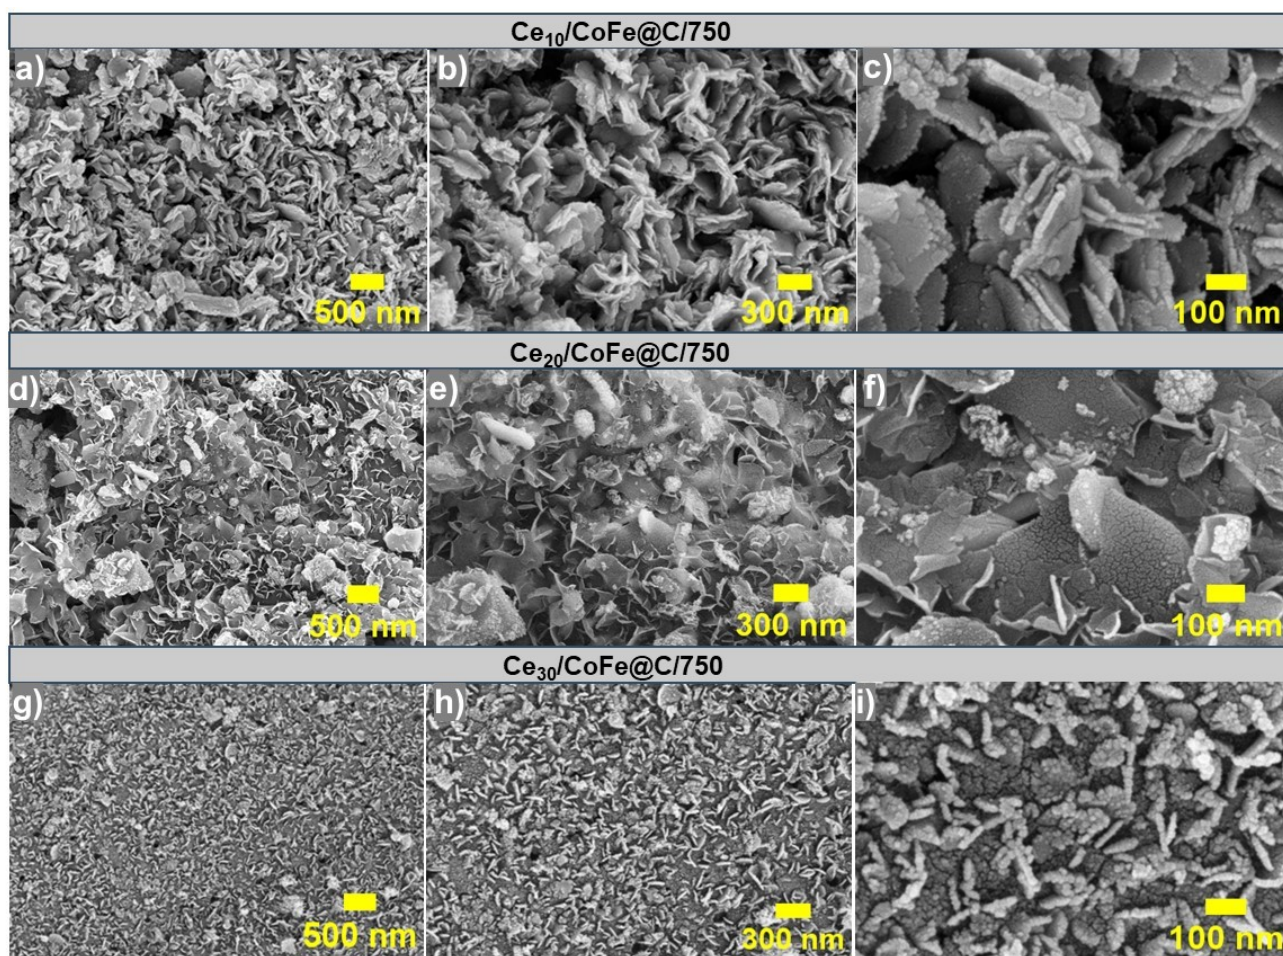

**Fig. S3.** SEM images of as-prepared catalysts (a-c)  $Ce_{10}/CoFe@C/750$ , (d-f)  $Ce_{20}/CoFe@C/750$ , and (g-i)  $Ce_{30}/CoFe@C/750$ .

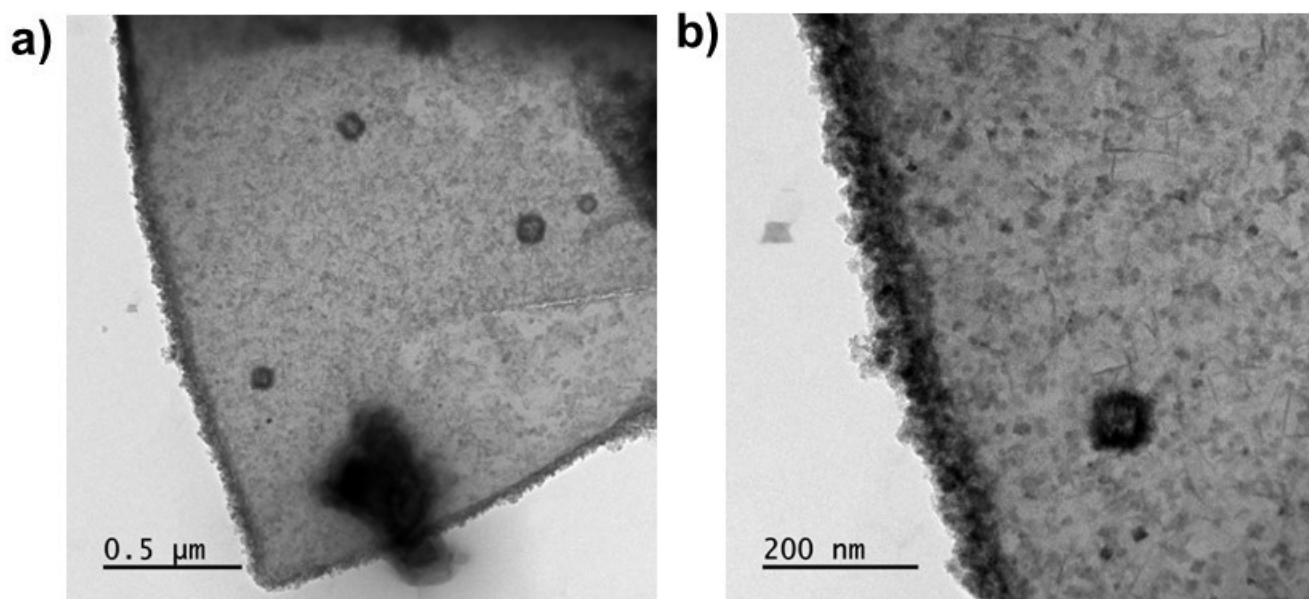

**Fig. S4.** (a-b) High-resolution and low-resolution TEM images of the  $\text{Ce}_{20}/\text{CoFe}@C/750$  sample.

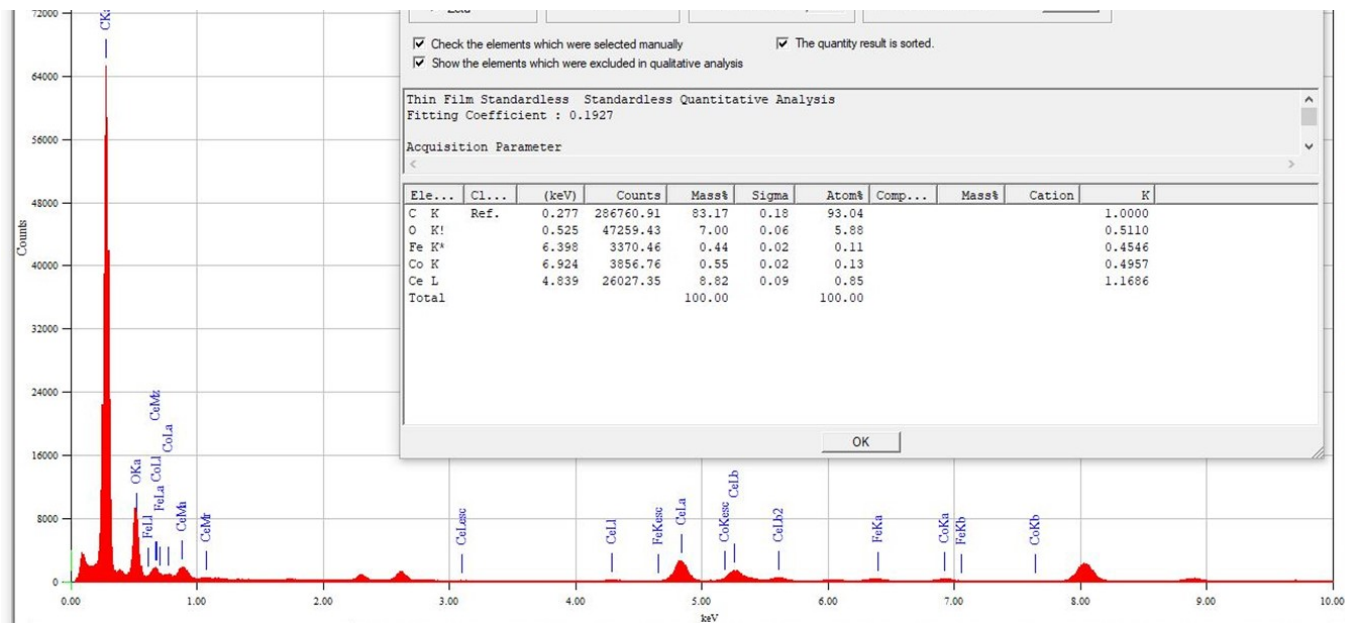

**Fig. S5.** EDS spectrum obtained via TEM, illustrating the elemental composition of the  $Ce_{20}/CoFe@C/750$  sample.



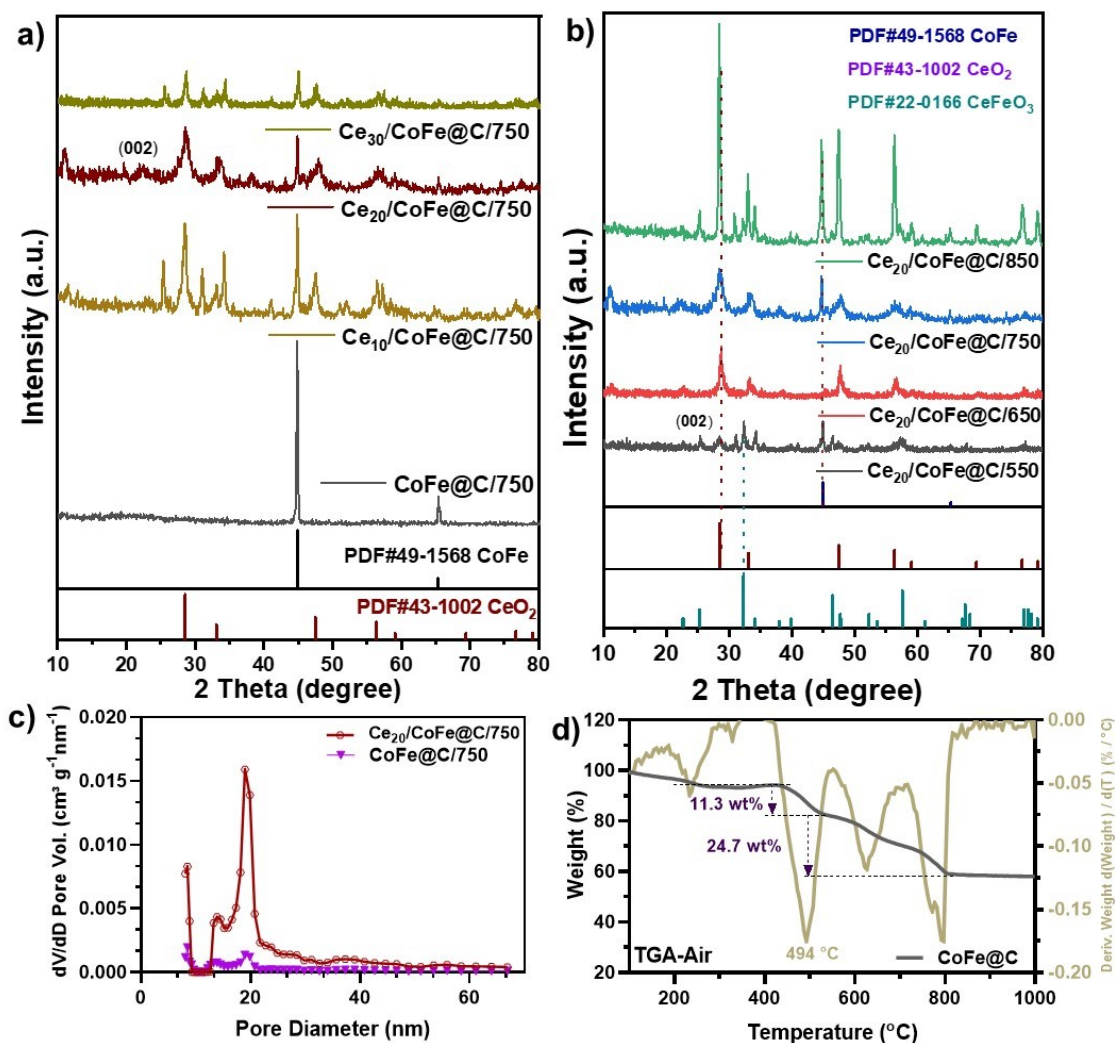

**Fig. S6.** (a) XRD pattern of the as-prepared samples with different Ce wt.%, (b) XRD pattern of the as-prepared samples at different temperatures, (c) Pore size distribution of  $\text{CoFe}@C/750$  and  $\text{Ce}_{20}/\text{CoFe}@C/750$  sample, and (c) DSC-TGA plot for  $\text{CoFe}@C/750$  sample.

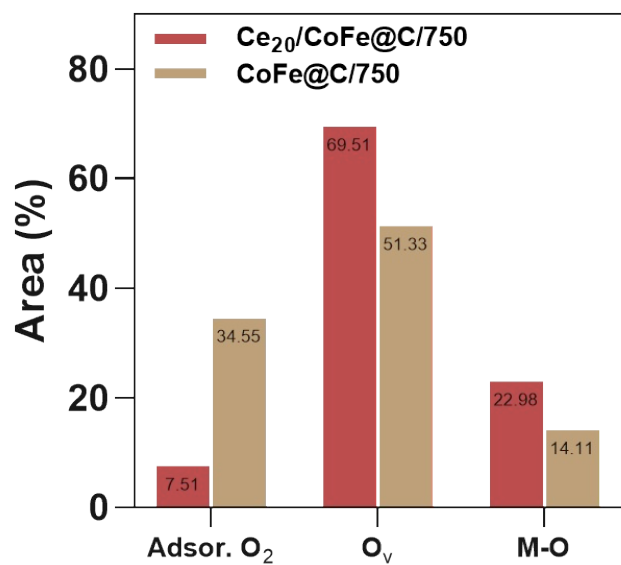

**Fig. S7.** Comparison of relative peak areas in O 1s spectra for Ce<sub>20</sub>/CoFe@C/750 and CoFe@C/750 samples.

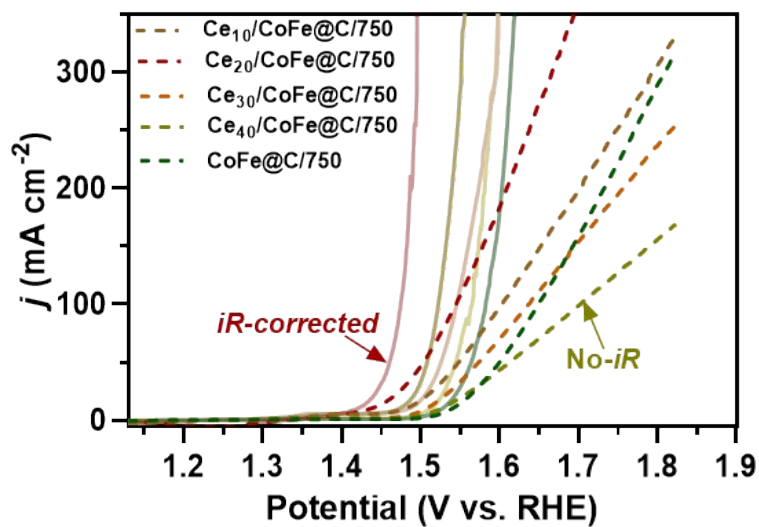

**Fig. S8.** *iR*-corrected and non-*iR*-corrected LSV curves of the prepared samples.

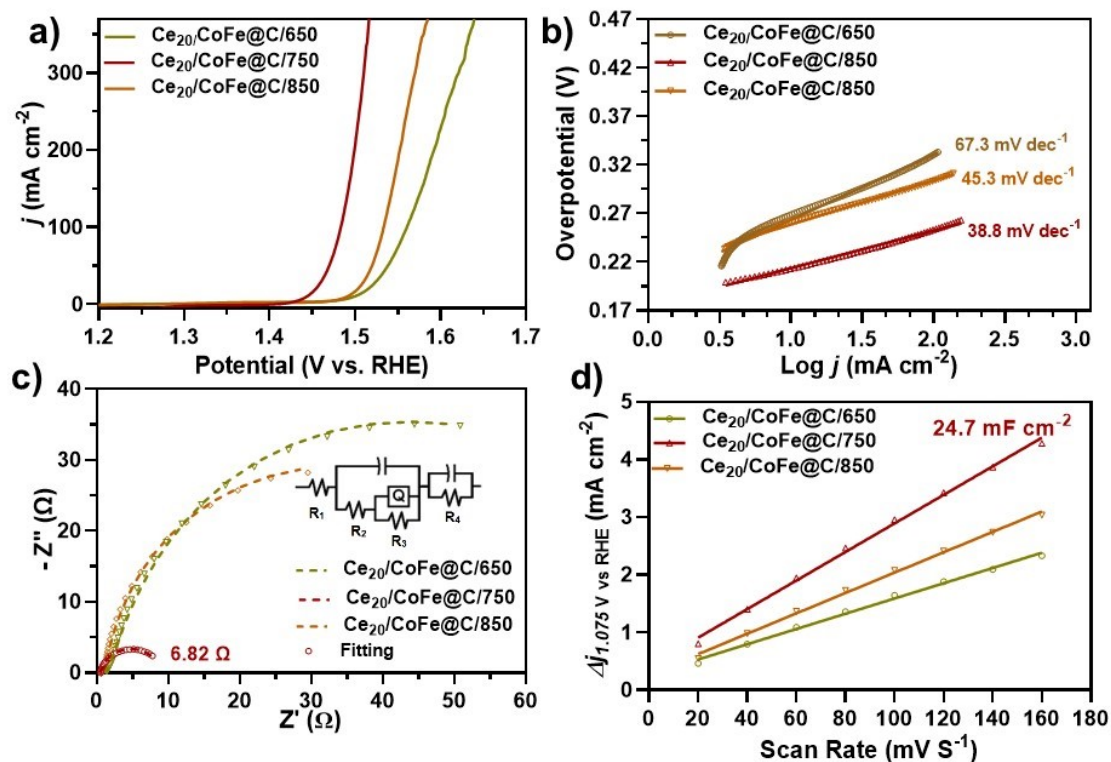

**Fig. S9** (a) LSV curves of samples prepared at different temperatures, (b) Tafel slopes; and (c) EIS inset: equivalent circuit model for fitting the Nyquist plots (d)  $C_{dl}$  measurement of  $Ce_{20}/CoFe@C/650$ ,  $Ce_{20}/CoFe@C/750$ , and  $Ce_{20}/CoFe@C/850$  samples.

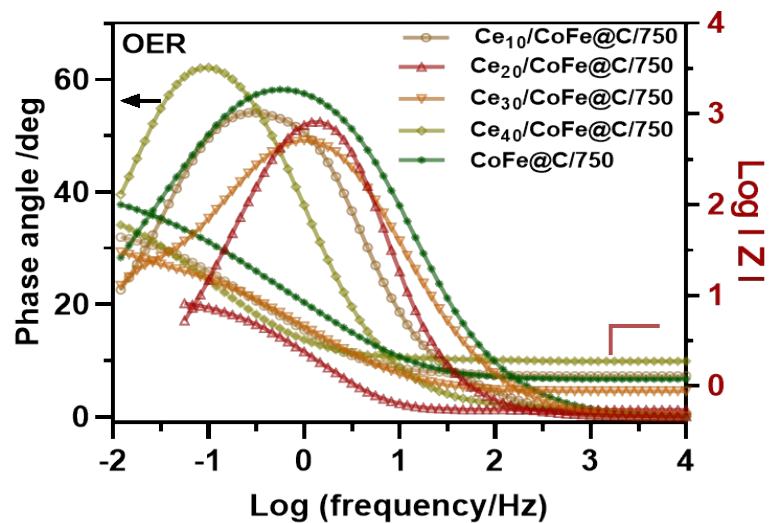

**Fig. S10.** Bode plot for EIS measurement, showing the frequency response of the system with magnitude and phase data across a range of frequencies.

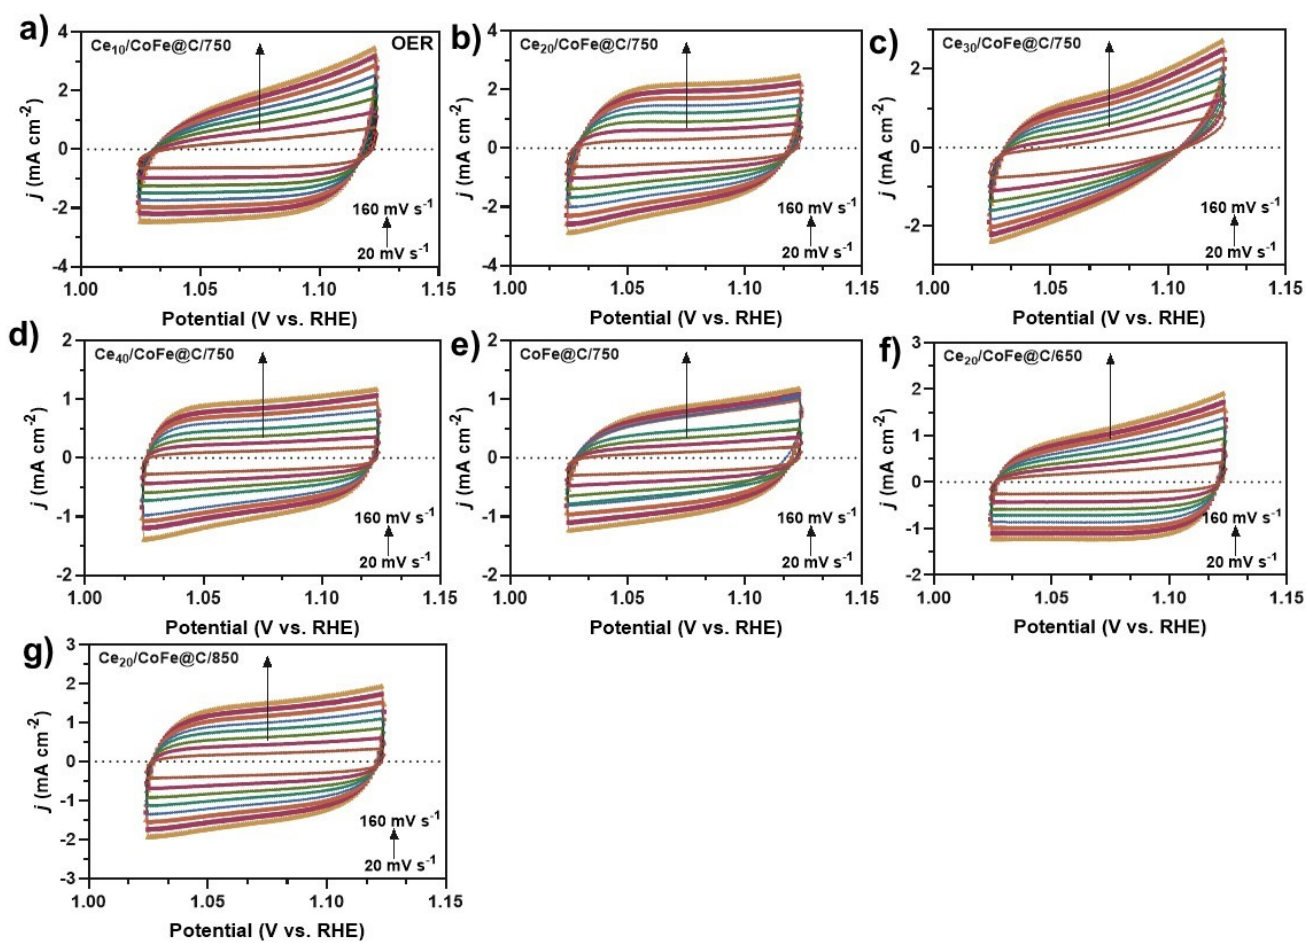

**Fig. S11.** CV at different scan rates from 20 to 160  $\text{mV s}^{-1}$  for OER in 1.0 M KOH solution. (a)  $\text{Ce}_{10}/\text{CoFe}@C/750$ , (b)  $\text{Ce}_{20}/\text{CoFe}@C/750$ , (c)  $\text{Ce}_{30}/\text{CoFe}@C/750$ , (d)  $\text{Ce}_{40}/\text{CoFe}@C/750$ , (e)  $\text{CoFe}@C/750$ , (f)  $\text{Ce}_{20}/\text{CoFe}@C/650$ , and (g)  $\text{Ce}_{20}/\text{CoFe}@C/850$ .

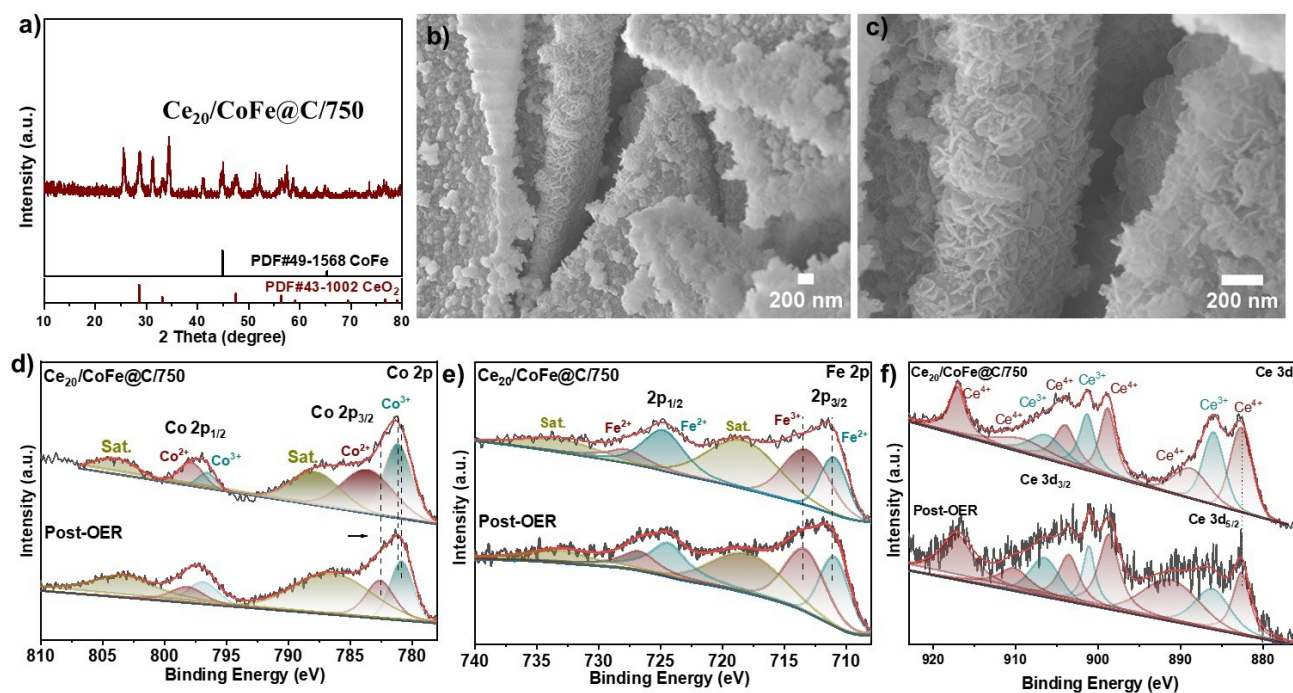

**Fig. S12.** (a) Post-OER XRD results of  $\text{Ce}_{20}/\text{CoFe}@C/750$  sample, (b-c) SEM images results of post-OER stability of  $\text{Ce}_{20}/\text{CoFe}@C/750$  sample, and d-f) Post OER XPS analysis of  $\text{Ce}_{20}/\text{CoFe}@C/750$  sample.

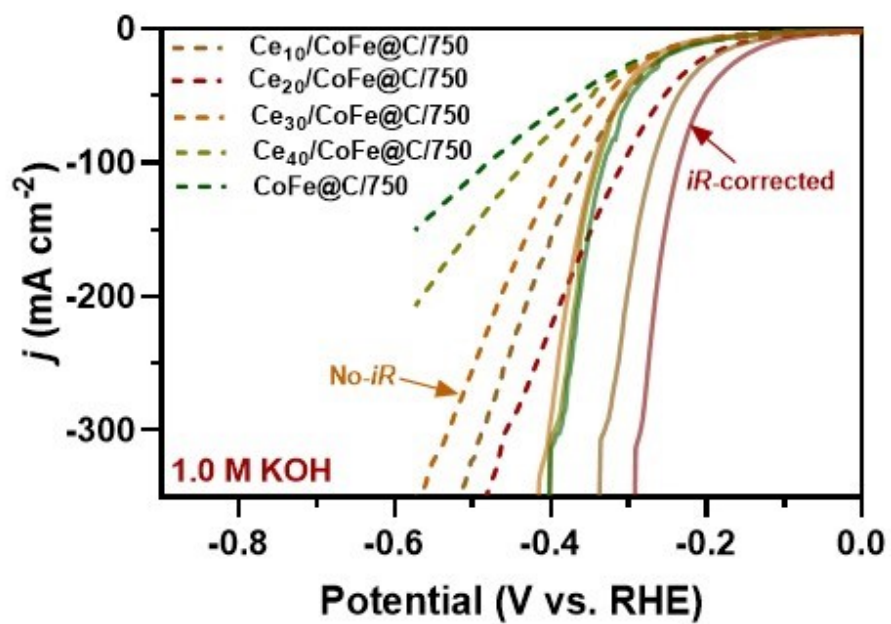

Fig. S13. *iR*-corrected and non-*iR*-corrected LSV curves of the as-prepared samples.

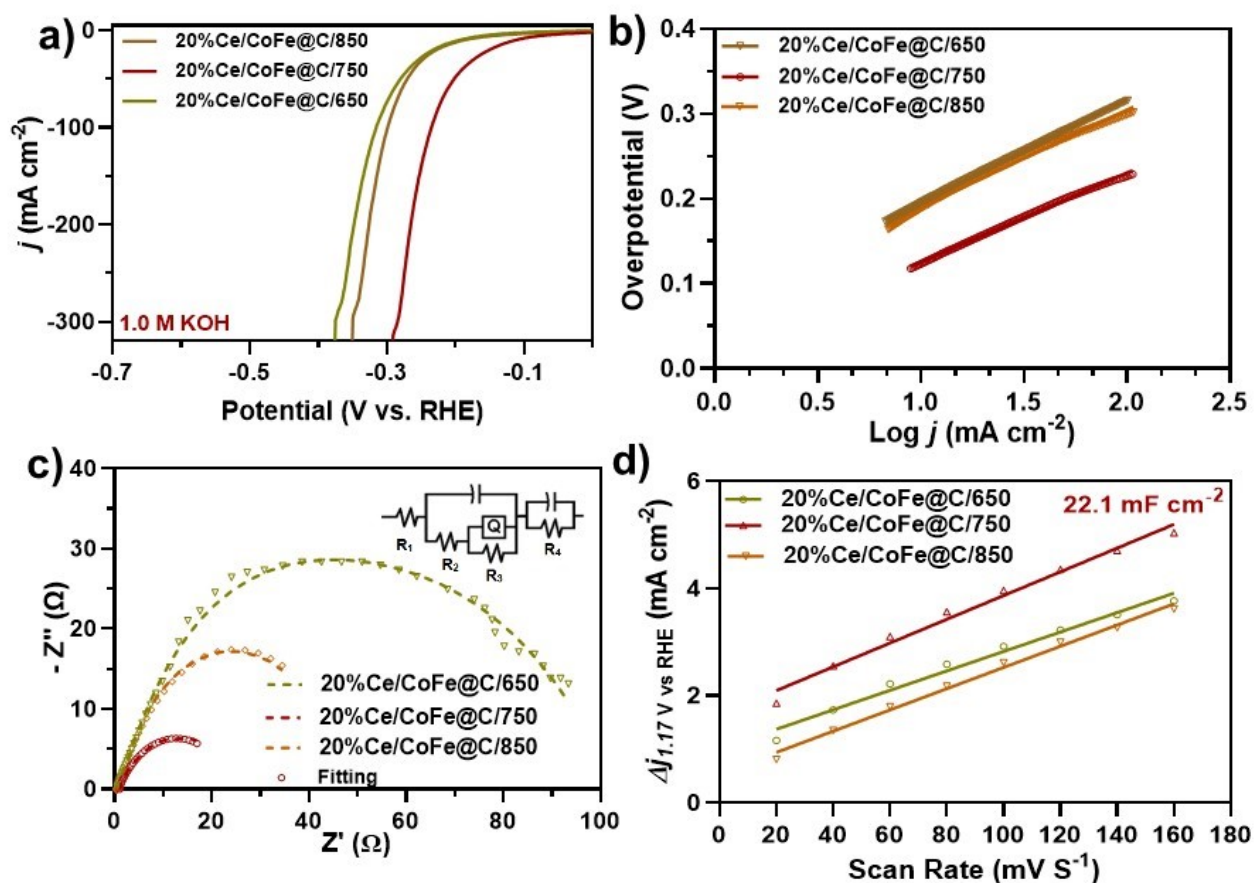

**Fig. S14.** (a) LSV curves of samples prepared at different temperatures, (b) Tafel slopes; and (c) EIS inset: equivalent circuit model for fitting the Nyquist plots (d)  $C_{dl}$  measurement of Ce<sub>20</sub>/CoFe@C/650, Ce<sub>20</sub>/CoFe@C/750, and Ce<sub>20</sub>/CoFe@C/850 samples.



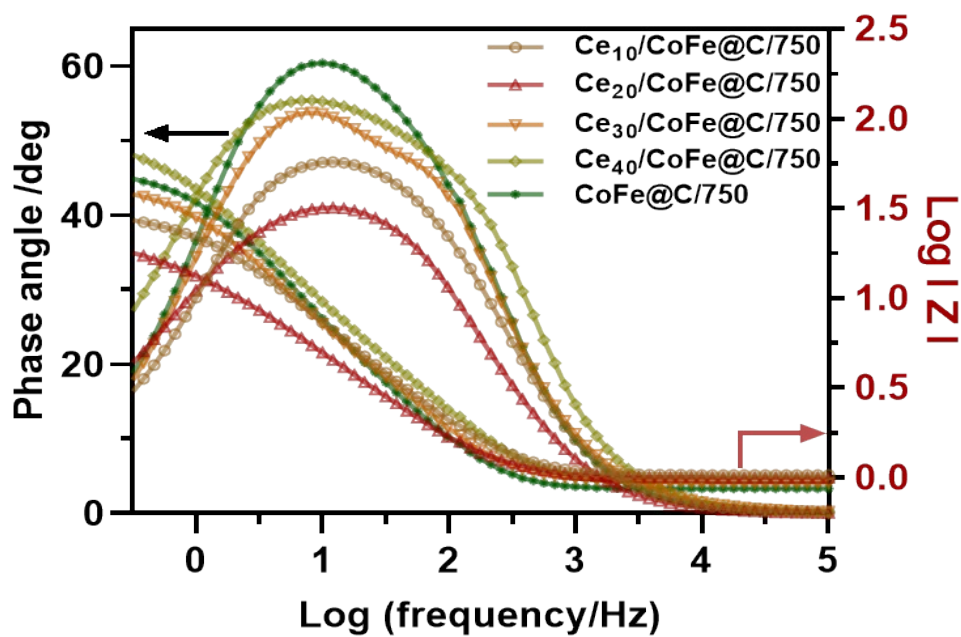

**Fig. S15.** Bode plot for EIS measurement, showing the frequency response of the system with magnitude and phase data across a range of frequencies.

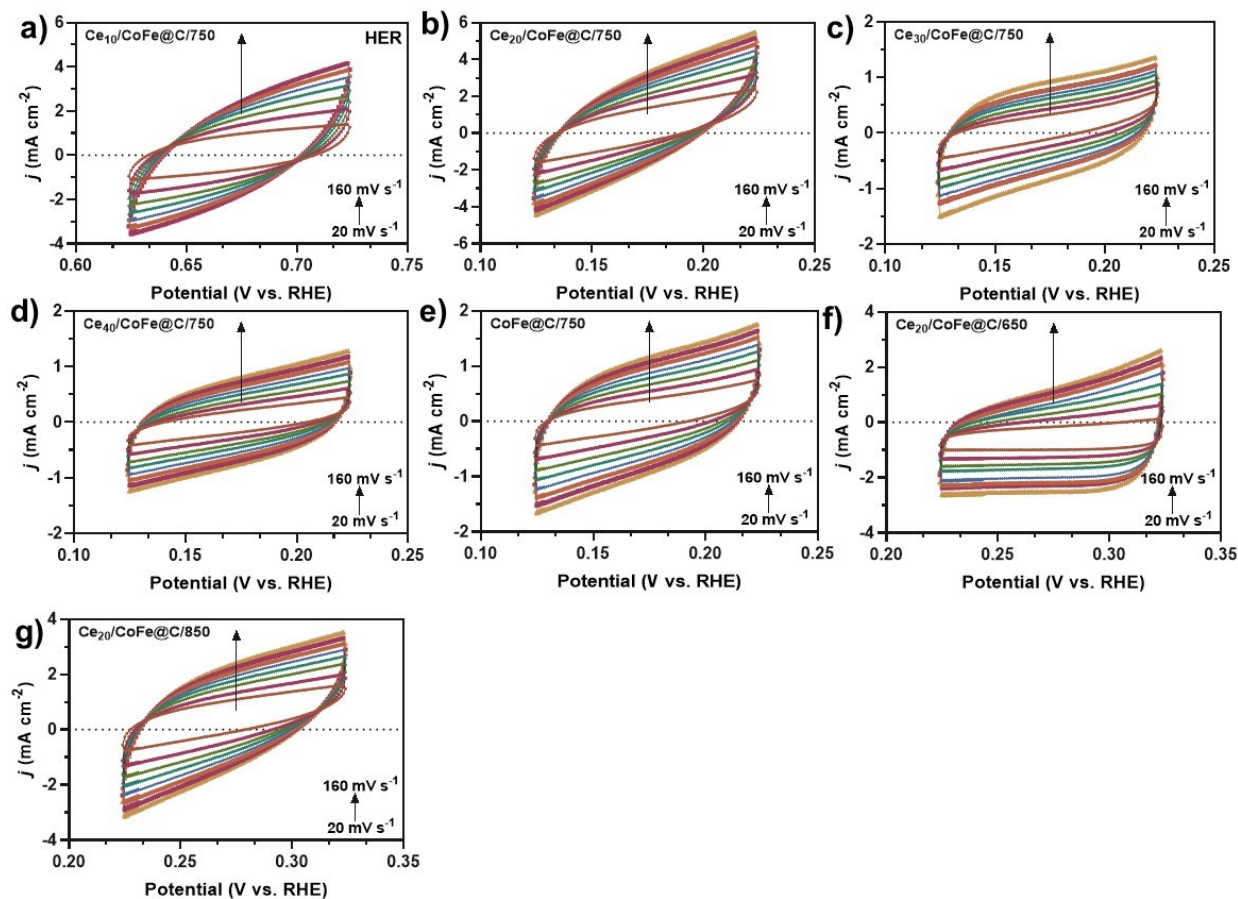

**Fig. S16.** CV at different scan rates from 20 to 160  $\text{mV s}^{-1}$  for HER in 1.0 M KOH solution. (a)  $\text{Ce}_{10}/\text{CoFe}@C/750$ , (b)  $\text{Ce}_{20}/\text{CoFe}@C/750$ , (c)  $\text{Ce}_{30}/\text{CoFe}@C/750$ , (d)  $\text{Ce}_{40}/\text{CoFe}@C/750$ , (e)  $\text{CoFe}@C/750$ , (f)  $\text{Ce}_{20}/\text{CoFe}@C/650$ , and (g)  $\text{Ce}_{20}/\text{CoFe}@C/850$ .

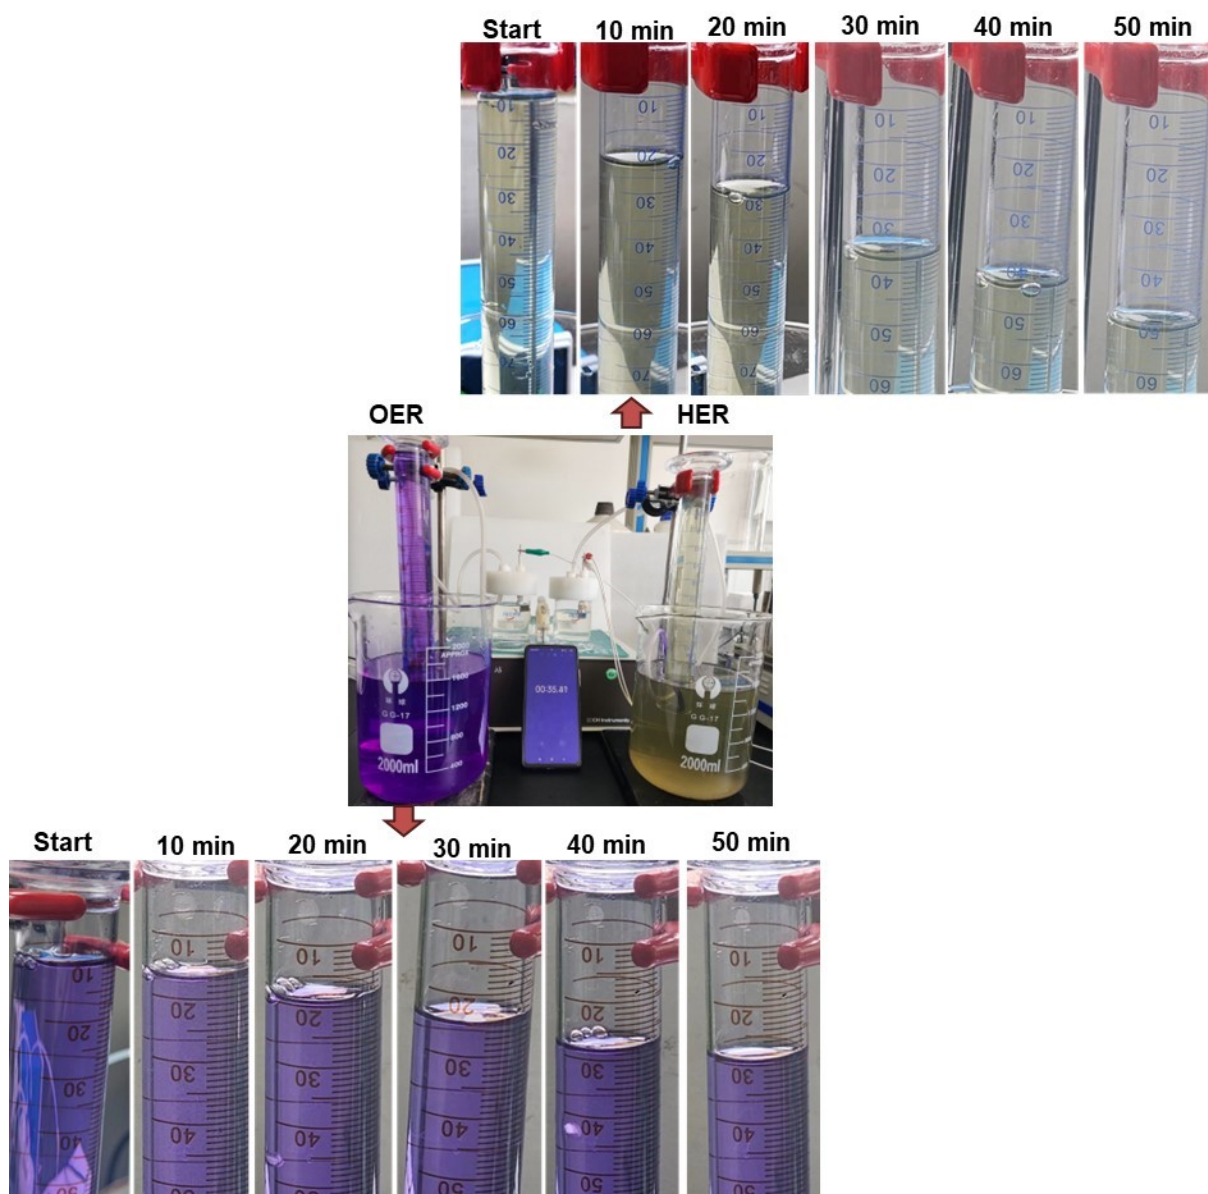

**Fig. S17.** Measurement of evolved  $H_2$  and  $O_2$  gas volume using a water displacement apparatus.

**Table S1.** Composition of precursor mixture for CeO<sub>2</sub>/CoFe@C catalyst with different Ce content.

| Ce (wt%) | Mass of Co salt (g) | Mass of Fe salt (g) | Mass of Ce salt (g) | Mass of Citric Acid (g) | Mass of Tartaric Acid (g) | Total Mass (g) |
|----------|---------------------|---------------------|---------------------|-------------------------|---------------------------|----------------|
| 10       | 0.166               | 0.166               | 0.200               | 0.733                   | 0.733                     | 2              |
| 20       | 0.166               | 0.166               | 0.400               | 0.633                   | 0.633                     | 2              |
| 30       | 0.166               | 0.166               | 0.600               | 0.533                   | 0.533                     | 2              |
| 40       | 0.166               | 0.166               | 0.800               | 0.433                   | 0.433                     | 2              |

**Table S2:** Atomic percentage of different elements calculated from survey data.

| Catalyst                          | Name | Peak Position | FWHM | Area      | Atomic % |
|-----------------------------------|------|---------------|------|-----------|----------|
| <b>Ce<sub>20</sub>/CoFe@C/750</b> | C1s  | 284.8         | 1.35 | 197502.57 | 80.03    |
|                                   | Ce3d | 883.43        | 7.21 | 130939.77 | 1.44     |
|                                   | Co2p | 781.38        | 4.06 | 61809.98  | 2.05     |
|                                   | Fe2p | 711.82        | 4.07 | 61961.53  | 2.44     |
|                                   | O1s  | 531.64        | 3.56 | 83728.9   | 14.03    |
| <b>CoFe@C/750</b>                 | C1s  | 284.8         | 1.25 | 202186.69 | 81.62    |
|                                   | Co2p | 781.3         | 4.57 | 75396.22  | 2.49     |
|                                   | Fe2p | 711.97        | 4.61 | 69310.07  | 2.72     |
|                                   | O1s  | 531.68        | 3.21 | 78878.06  | 13.17    |

**Table S3.** Electrochemical performance for OER in 1.0 M KOH electrolyte media.

|    | <b>Catalyst</b>              | <b>Overpotential<br/><math>\eta_{10}</math> (mV)</b> | <b>Tafel<br/>(mV dec<sup>-1</sup>)</b> | <b>C<sub>dl</sub><br/>(mF cm<sup>-2</sup>)</b> | <b>ECSA<br/>(cm<sup>2</sup><sub>ECSA</sub>)</b> |
|----|------------------------------|------------------------------------------------------|----------------------------------------|------------------------------------------------|-------------------------------------------------|
| 1. | Ce <sub>10</sub> /CoFe@C/750 | 244                                                  | 51.8                                   | 22.7                                           | 567                                             |
| 2. | Ce <sub>20</sub> /CoFe@C/750 | 191                                                  | 38.8                                   | 24.7                                           | 617                                             |
| 3. | Ce <sub>30</sub> /CoFe@C/750 | 256                                                  | 62.6                                   | 14.5                                           | 362                                             |
| 4. | Ce <sub>40</sub> /CoFe@C/750 | 283                                                  | 50.4                                   | 11.7                                           | 292                                             |
| 5. | CoFe@C/750                   | 298                                                  | 54.4                                   | 10.7                                           | 267                                             |
| 6. | RuO <sub>2</sub>             | 324                                                  | 71.6                                   | -                                              | -                                               |
| 7. | Ce <sub>20</sub> /CoFe@C/650 | 270                                                  | 67.3                                   | 13.2                                           | 330                                             |
| 8. | Ce <sub>20</sub> /CoFe@C/850 | 261                                                  | 45.3                                   | 17.6                                           | 440                                             |

**Table S4.** The equivalent circuit diagram fitting values of the electrochemical impedance spectrum for different catalysts.

|                              | $R_s$ ( $\Omega$ ) OER | $R_{ct}$ ( $\Omega$ ) OER | $R_s$ ( $\Omega$ ) HER | $R_{ct}$ ( $\Omega$ ) HER |
|------------------------------|------------------------|---------------------------|------------------------|---------------------------|
| Ce <sub>10</sub> /CoFe@C/750 | 1.292                  | 47.24                     | 1.03                   | 25.8                      |
| Ce <sub>20</sub> /CoFe@C/750 | 0.05                   | 6.82                      | 1.00                   | 22.4                      |
| Ce <sub>30</sub> /CoFe@C/750 | 0.87                   | 21.9                      | 0.81                   | 41.4                      |
| Ce <sub>40</sub> /CoFe@C/750 | 1.87                   | 90.7                      | 0.95                   | 82.8                      |
| CoFe@C/750                   | 1.18                   | 157.1                     | 0.86                   | 39.4                      |
| Ce <sub>20</sub> /CoFe@C/650 | 1.23                   | 72.5                      | 0.56                   | 84.4                      |
| Ce <sub>20</sub> /CoFe@C/850 | 0.72                   | 46.7                      | 0.45                   | 37.6                      |

**Table S5.** Electrochemical activity for HER in 1.0 M KOH electrolyte media.

|    | <b>Catalyst</b>              | <b>Overpotential<br/><math>\eta_{10}</math> (mV)</b> | <b>Tafel<br/>(mV dec<sup>-1</sup>)</b> | <b>C<sub>dl</sub><br/>(mF cm<sup>-2</sup>)</b> | <b>ECSA<br/>(cm<sup>2</sup><sub>ECSA</sub>)</b> |
|----|------------------------------|------------------------------------------------------|----------------------------------------|------------------------------------------------|-------------------------------------------------|
| 1. | Pt/C 10%                     | 56                                                   | 60.2                                   | -                                              | -                                               |
| 2. | Ce <sub>10</sub> /CoFe@C/750 | 147                                                  | 123.9                                  | 19.1                                           | 477                                             |
| 3. | Ce <sub>20</sub> /CoFe@C/750 | 124                                                  | 105.3                                  | 22.1                                           | 552                                             |
| 4. | Ce <sub>30</sub> /CoFe@C/750 | 225                                                  | 129.1                                  | 9.45                                           | 236                                             |
| 5. | Ce <sub>40</sub> /CoFe@C/750 | 215                                                  | 136.3                                  | 8.19                                           | 204                                             |
| 6. | CoFe@C/750                   | 201                                                  | 132.0                                  | 10.9                                           | 272                                             |
| 7. | Ce <sub>20</sub> /CoFe@C/650 | 196                                                  | 121.2                                  | 18.1                                           | 452                                             |
| 8. | Ce <sub>20</sub> /CoFe@C/850 | 189                                                  | 115.0                                  | 19.8                                           | 495                                             |



**Table S6:** The comparative performance of most recently reported literature for HER, OER, and overall water splitting in 1.0 M KOH solution.

| Electrocatalyst                                                                             | Overpotential ( $\eta$ , mV)<br>at 10 mA cm <sup>-2</sup> |     | Tafel slope<br>(mV dec <sup>-1</sup> ) |       | Overall<br>voltage (V)<br>at 10 mA cm <sup>-2</sup> | Reference |
|---------------------------------------------------------------------------------------------|-----------------------------------------------------------|-----|----------------------------------------|-------|-----------------------------------------------------|-----------|
|                                                                                             | HER                                                       | OER | HER                                    | OER   |                                                     |           |
| Ce <sub>20</sub> /CoFe@C/750                                                                | 114                                                       | 191 | 105.3                                  | 38.8  | 1.508                                               | This work |
| CeCO <sub>3</sub> OH/Ce-CoFe LDH                                                            | 165                                                       | 216 | 89.8                                   | 40.1  | 1.610                                               | [3]       |
| Co <sub>1-<math>\delta</math></sub> Fe <sub><math>\delta</math></sub> LDH/g-CN <sub>x</sub> | 270                                                       | 280 | 79                                     | 29    | 1.610                                               | [4]       |
| CoFe-LDH/GF                                                                                 | -                                                         | 252 | -                                      | 61    | -                                                   | [5]       |
| CoFeO@BP                                                                                    | 88                                                        | 266 | 51                                     | 42    | 1.58                                                | [6]       |
| Ce-CoFe-LDH/NF                                                                              | -                                                         | 225 | -                                      | 34.3  | -                                                   | [7]       |
| 5% Ce-CoP/Fe <sub>2</sub> P                                                                 | -                                                         | 250 | -                                      | 46.1  | -                                                   | [8]       |
| FeO <sub>x</sub> /CeO <sub>2</sub>                                                          | -                                                         | 252 | -                                      | 45    | -                                                   | [9]       |
| CeO <sub>2</sub> Co <sub>0.9</sub> Fe <sub>0.1</sub> -Se/NF-CoO                             | -                                                         | 296 | -                                      | 76.7  | -                                                   | [10]      |
| NiCoFeB                                                                                     | 174                                                       | 208 | 60.2                                   | 41.4  | 1.630                                               | [11]      |
| CoSe-CC/NiSe-CC,                                                                            | 180                                                       | 420 | 64.2                                   | 59.2  | 1.600                                               | [12]      |
| NiMn <sub>2</sub> O@NM                                                                      | 248                                                       | 250 | 198                                    | 218   | 1.690                                               | [13]      |
| Cd-Ni <sub>3</sub> S <sub>2</sub> /NF                                                       | 140                                                       | 197 | 144                                    | 54    | 1.540                                               | [14]      |
| Co <sub>3</sub> Fe/Ce <sub>0.025</sub>                                                      | 178                                                       | 285 | 75.3                                   | 47.2  | 1.700                                               | [15]      |
| Co <sub>0.9</sub> Fe <sub>0.1</sub> -Se/NF                                                  | 125                                                       | 246 | 85.4                                   | -     | 1.550                                               | [16]      |
| Co-Ni-P@NF                                                                                  | 92                                                        | 277 | 87.6                                   | 63.6  | 1.640                                               | [17]      |
| CoNiP/NF                                                                                    | 147                                                       | 234 | 51                                     | 47    | 1.620                                               | [18]      |
| NiFe-Pi/P@NF**                                                                              | 97                                                        | 255 | 56                                     | 81    | 1.570                                               | [19]      |
| Ni <sub>2</sub> P@NPC@CC                                                                    | 92                                                        | 280 | 59                                     | 48.5  | 1.540                                               | [20]      |
| Cu@CoFe LDH                                                                                 | 171                                                       | 240 | 36.4                                   | 44.4  | 1.681                                               | [21]      |
| CoMo@BC                                                                                     | 167                                                       | 279 | 98.7                                   | 67.14 | 1.650                                               | [22]      |
| Ru-FeCoP                                                                                    | 94                                                        | 310 | 95.4                                   | 62.8  | 1.650                                               | [23]      |
| Mo <sub>x</sub> C/Ni <sub>3</sub> Fe@GL                                                     | 150                                                       | 265 | 89.96                                  | 59.6  | 1.523                                               | [24]      |

## References

- [1] B. Zhang, X. Zheng, O. Voznyy, R. Comin, M. Bajdich, M. García-Melchor, L. Han, J. Xu, M. Liu, L. Zheng, F.P.G. De Arquer, C.T. Dinh, F. Fan, M. Yuan, E. Yassitepe, N. Chen, T. Regier, P. Liu, Y. Li, P. De Luna, A. Janmohamed, H.L. Xin, H. Yang, A. Vojvodic, E.H. Sargent, Homogeneously dispersed multimetal oxygen-evolving catalysts, *Science* (80-. ). (2016). <https://doi.org/10.1126/science.aaf1525>.
- [2] Z. Yan, H. Sun, X. Chen, H. Liu, Y. Zhao, H. Li, W. Xie, F. Cheng, J. Chen, Anion insertion enhanced electrodeposition of robust metal hydroxide/oxide electrodes for oxygen evolution, *Nat. Commun.* 9 (2018) 2373. <https://doi.org/10.1038/s41467-018-04788-3>.
- [3] J. Tang, J. Hu, X. Chen, B. Yang, K. Zhang, Y. Li, Y. Yao, S. Zhang, Boosting activity on CoFe layered double hydroxide by doping and heterostructure as a bifunctional electrocatalyst for efficient overall water splitting, *Fuel*. (2024). <https://doi.org/10.1016/j.fuel.2024.131128>.
- [4] T. Bhowmik, M.K. Kundu, S. Barman, CoFe Layered Double Hydroxide Supported on Graphitic Carbon Nitrides: An Efficient and Durable Bifunctional Electrocatalyst for Oxygen Evolution and Hydrogen Evolution Reactions, *ACS Appl. Energy Mater.* 1 (2018) 1200–1209. <https://doi.org/10.1021/acsaem.7b00305>.
- [5] B. Deng, J. Liang, L. Yue, T. Li, Q. Liu, Y. Liu, S. Gao, A.A. Alshehri, K.A. Alzahrani, Y. Luo, X. Sun, CoFe-LDH nanowire arrays on graphite felt: A high-performance oxygen evolution electrocatalyst in alkaline media, *Chinese Chem. Lett.* (2022). <https://doi.org/10.1016/j.ccllet.2021.10.002>.
- [6] X. Li, L. Xiao, L. Zhou, Q. Xu, J. Weng, J. Xu, B. Liu, Adaptive Bifunctional Electrocatalyst of Amorphous CoFe Oxide @ 2D Black Phosphorus for Overall Water Splitting, *Angew. Chemie - Int. Ed.* (2020). <https://doi.org/10.1002/anie.202008514>.
- [7] L. Wang, Y. Liu, X. Liu, W. Chen, 3D nanostructured Ce-doped CoFe-LDH/NF self-supported catalyst for high-performance OER, *Dalt. Trans.* 52 (2023) 12038–12048. <https://doi.org/10.1039/D3DT01814H>.
- [8] Y. Huang, M. Li, W. Yang, Y. Yu, S. Hao, Ce-Doped Ordered Mesoporous Cobalt Ferrite Phosphides as Robust Catalysts for Water Oxidation, *Chem. – A Eur. J.* 26 (2020) 13305–13310. <https://doi.org/10.1002/chem.202003185>.
- [9] Q. Sun, Y. Liu, X. Li, X. Guo, W.-H. Huang, Y. Zhu, Z. Wang, C.-C. Chueh, C.-L. Chen, Y.-K. Peng, Z. Zhu, Highly Disordered Fe-Doped CeO<sub>2</sub> with Oxygen Vacancies Facilitates Electrocatalytic Water Oxidation, *Energy & Fuels.* 37 (2023) 9434–9443. <https://doi.org/10.1021/acs.energyfuels.3c00621>.
- [10] W. Li, L. Zhao, C. Wang, X. Lu, W. Chen, Interface Engineering of Heterogeneous CeO<sub>2</sub> – CoO Nanofibers with Rich Oxygen Vacancies for Enhanced Electrocatalytic Oxygen Evolution Performance, *ACS Appl. Mater. Interfaces.* 13 (2021) 46998–47009. <https://doi.org/10.1021/acsaami.1c11101>.
- [11] M. Moloudi, A. Noori, M.S. Rahmanifar, Y. Shabangoli, M.F. El-Kady, N.B. Mohamed, R.B. Kaner, M.F. Mousavi, Layered Double Hydroxide Templated Synthesis of Amorphous NiCoFeB as a Multifunctional Electrocatalyst for Overall Water Splitting and Rechargeable Zinc–Air Batteries, *Adv. Energy Mater.* 13 (2023). <https://doi.org/10.1002/aenm.202203002>.

- [12] M. Hassan, M.M. Baig, S. Yousaf, M. Faheem, A. Hussain, B. Niaz, F.A. Khan, S. Aziz, Y. Ahmed, K.H. Shah, S.G. Lee, Efficient water splitting catalyst: Low-temperature selenization of Co and Ni hydroxide nanosheets on carbon cloth for enhanced electro-catalytic activity, *Diam. Relat. Mater.* 139 (2023) 110298. <https://doi.org/10.1016/j.diamond.2023.110298>.
- [13] P.C. Nagajyothi, K. Pavani, R. Ramaraghavulu, J. Shim, Microwave synthesis of NiMn<sub>2</sub>O<sub>4</sub>/Ni-foam: Efficient bifunctional electrocatalysts for overall water splitting, *Int. J. Hydrogen Energy.* (2023). <https://doi.org/10.1016/j.ijhydene.2023.09.046>.
- [14] H. Yan, R. Deng, S. Zhang, H. Yao, J. Duan, H. Bai, Y. Li, R. Liu, K. Shi, S. Ma, Cd doped Ni<sub>3</sub>S<sub>2</sub> nanosheet arrays grown on nickel foam as highly efficient and robust bifunctional electrocatalysts for alkaline overall water splitting, *J. Alloys Compd.* 954 (2023) 170072. <https://doi.org/10.1016/j.jallcom.2023.170072>.
- [15] X.-Z. Song, T. Zhang, Y.-H. Zhao, J.-C. Ni, Y. Pan, Z. Tan, X.-F. Wang, Heterostructure Interface Engineering in CoP/FeP/CeO<sub>x</sub> with a Tailored d-Band Center for Promising Overall Water Splitting Electrocatalysis, *Inorg. Chem.* 62 (2023) 8347–8356. <https://doi.org/10.1021/acs.inorgchem.3c00876>.
- [16] H. Ren, L. Yu, L. Yang, Z.H. Huang, F. Kang, R. Lv, Efficient electrocatalytic overall water splitting and structural evolution of cobalt iron selenide by one-step electrodeposition, *J. Energy Chem.* (2021). <https://doi.org/10.1016/j.jechem.2021.01.002>.
- [17] L. Chai, S. Liu, S. Pei, C. Wang, Electrodeposited amorphous cobalt-nickel-phosphide-derived films as catalysts for electrochemical overall water splitting, *Chem. Eng. J.* 420 (2021) 129686. <https://doi.org/10.1016/j.cej.2021.129686>.
- [18] H. Liu, R. Huang, W. Chen, Y. Zhang, M. Wang, Y. Hu, Y. Zhou, Y. Song, Porous 2D cobalt–nickel phosphide triangular nanowall architecture assembled by 3D microsphere for enhanced overall water splitting, *Appl. Surf. Sci.* 569 (2021) 150762. <https://doi.org/10.1016/j.apsusc.2021.150762>.
- [19] W. Li, M. Chen, Y. Lu, P. Qi, G. Liu, Y. Zhao, H. Wu, Y. Tang, One-pot electrodeposition synthesis of NiFe-phosphate/phosphide hybrid nanosheet arrays for efficient water splitting, *Appl. Surf. Sci.* 598 (2022) 153717. <https://doi.org/10.1016/j.apsusc.2022.153717>.
- [20] B. Ma, X. Duan, W. Han, X. Fan, Y. Li, F. Zhang, G. Zhang, W. Peng, Decorated nickel phosphide nanoparticles with nitrogen and phosphorus co-doped porous carbon for enhanced electrochemical water splitting, *J. Colloid Interface Sci.* 567 (2020) 393–401. <https://doi.org/10.1016/j.jcis.2020.02.033>.
- [21] L. Yu, H. Zhou, J. Sun, F. Qin, D. Luo, L. Xie, F. Yu, J. Bao, Y. Li, Y. Yu, S. Chen, Z. Ren, Hierarchical Cu@CoFe layered double hydroxide core-shell nanoarchitectures as bifunctional electrocatalysts for efficient overall water splitting, *Nano Energy.* 41 (2017) 327–336. <https://doi.org/10.1016/j.nanoen.2017.09.045>.
- [22] W. Yaseen, S. Meng, W. Li, M. Xie, M. Rafiq, B. Adegbemiga Yusuf, S.A. Shah, I. Khan, J. Xie, Y. Xu, Facile synthesis of CoMoO<sub>4</sub>/CoMoB/boron-doped carbon nanocomposite as a highly durable bifunctional electrocatalyst for overall water splitting, *Int. J. Hydrogen Energy.* 51 (2024) 565–577. <https://doi.org/10.1016/j.ijhydene.2023.06.315>.
- [23] L. Zhang, X. Cao, C. Guo, A. Hassan, Y. Zhang, J. Wang, Interface and morphology engineering of Ru-FeCoP hollow nanocages as alkaline electrocatalyst for overall water

splitting, *J. Environ. Chem. Eng.* 11 (2023) 111373.  
<https://doi.org/https://doi.org/10.1016/j.jece.2023.111373>.

- [24] P. Zhang, J. Zhang, Y. Fu, J. Zhang, J. Wang, Bottom-up self-assembly strategy to construct ternary Mo C/Ni<sub>3</sub>Fe@GL as efficient water splitting electrocatalyst, *Int. J. Hydrogen Energy*. 51 (2024) 1337–1346. <https://doi.org/10.1016/j.ijhydene.2023.11.082>.
